# Supplementary material for: Gender Trends in Healthcare and Academia—Where Does the University of Malta Stand?
Source: MDPI journal article supplement (doi:10.3390/socsci11100463), 2022-10-10
Supplement: s1 [file s1]

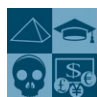**Table S1.** – Students within the Faculty of Dental Surgery across 15 academic years.

| Year of studies | Female (F) | Male (M) | M:F ratio | Total |
|-----------------|------------|----------|-----------|-------|
| 2007 - 2008     | 17         | 17       | 1.00      | 34    |
| 2008 - 2009     | 17         | 19       | 1.12      | 36    |
| 2009 - 2010     | 18         | 36       | 2.00      | 54    |
| 2010 - 2011     | 26         | 20       | 0.77      | 46    |
| 2011 - 2012     | 30         | 20       | 0.67      | 50    |
| 2012 - 2013     | 41         | 22       | 0.54      | 63    |
| 2013 - 2014     | 44         | 19       | 0.43      | 63    |
| 2014 - 2015     | 44         | 19       | 0.43      | 63    |
| 2015 - 2016     | 48         | 22       | 0.46      | 70    |
| 2016 - 2017     | 46         | 27       | 0.59      | 73    |
| 2017 - 2018     | 87         | 36       | 0.41      | 123   |
| 2018 - 2019     | 61         | 36       | 0.59      | 97    |
| 2019 - 2020     | 64         | 39       | 0.61      | 103   |
| 2020 - 2021     | 62         | 34       | 0.55      | 96    |
| 2021 - 2022     | 83         | 34       | 0.41      | 117   |

**Table S2.** – Academic Staff within the Faculty of Dental Surgery for academic year 2022/2023.

| Dean | Deputy Dean | Head of Department |
|------|-------------|--------------------|
| Male | Female      | Female             |

**Table S3** - Students within the Faculty of Health Sciences across 15 academic years.

| <b>Year of Studies</b> | <b>Female (F)</b> | <b>Male (M)</b> | <b>M:F Ratio</b> | <b>Total</b> |
|------------------------|-------------------|-----------------|------------------|--------------|
| 2007 - 2008            | 548               | 197             | 0.36             | 725          |
| 2008 - 2009            | 644               | 224             | 0.35             | 867          |
| 2009 - 2010            | 641               | 224             | 0.35             | 865          |
| 2010 - 2011            | 266               | 98              | 0.37             | 364          |
| 2011 - 2012            | 864               | 352             | 0.41             | 1216         |
| 2012 - 2013            | 1330              | 531             | 0.40             | 1861         |
| 2013 - 2014            | 949               | 372             | 0.39             | 1321         |
| 2014 - 2015            | 999               | 357             | 0.36             | 1356         |
| 2015 - 2016            | 955               | 335             | 0.35             | 1290         |
| 2016 - 2017            | 948               | 326             | 0.34             | 1274         |
| 2017 - 2018            | 915               | 313             | 0.34             | 1228         |
| 2018 - 2019            | 895               | 335             | 0.37             | 1230         |
| 2019 - 2020            | 874               | 324             | 0.37             | 1198         |
| 2020 - 2021            | 827               | 315             | 0.38             | 1141         |
| 2021 - 2022            | 770               | 270             | 0.35             | 1015         |

**Table S4** - Academic Staff within the Faculty of Health Sciences for academic year 2022/2023.

| <b>Dean</b> | <b>Deputy Dean</b> | <b>Heads of Department</b> |        |
|-------------|--------------------|----------------------------|--------|
| Male        | Male               | Male                       | Female |
| 1           | 1                  | 2                          | 9      |

**Table S5.** Students within the Faculty of Medicine and Surgery across 15 academic years.

| <b>Year of Study</b> | <b>Female (F)</b> | <b>Male (M)</b> | <b>M:F Ratio</b> | <b>Total</b> |
|----------------------|-------------------|-----------------|------------------|--------------|
| 2007 - 2008          | 361               | 242             | 0.67             | 603          |
| 2008 - 2009          | 384               | 277             | 0.72             | 661          |
| 2009 - 2010          | 395               | 303             | 0.77             | 698          |
| 2010 - 2011          | 453               | 366             | 0.81             | 819          |
| 2011 - 2012          | 471               | 419             | 0.89             | 889          |
| 2012 - 2013          | 514               | 413             | 0.80             | 917          |
| 2013 - 2014          | 539               | 436             | 0.81             | 975          |
| 2014 - 2015          | 582               | 473             | 0.81             | 1055         |
| 2015 - 2016          | 565               | 482             | 0.85             | 1047         |
| 2016 - 2017          | 614               | 506             | 0.82             | 1120         |
| 2017 - 2018          | 650               | 485             | 0.75             | 1135         |
| 2018 - 2019          | 666               | 455             | 0.68             | 1121         |
| 2019 - 2020          | 636               | 426             | 0.67             | 1062         |
| 2020 - 2021          | 648               | 438             | 0.68             | 1086         |
| 2021 - 2022          | 702               | 420             | 0.60             | 1123         |

**Table S6.** - Academic Staff within the Faculty of Medicine and Surgery for academic year 2022/2023.

| <b>Dean</b> | <b>Deputy Dean</b> | <b>Heads of Department</b> |   |
|-------------|--------------------|----------------------------|---|
| M           | M                  | M                          | F |
| 1           | 1                  | 10                         | 8 |
